# Supplementary material for: PEGylation of Deferoxamine for Improving the Stability, Cytotoxicity, and Iron-Overload in an Experimental Stroke Model in Rats
Source: PubMed Central journal article supplement (PMC7546414; doi:10.3389/fbioe.2020.592294), 2020-09-25
Supplement: Image_1.pdf [file Image_1.pdf]

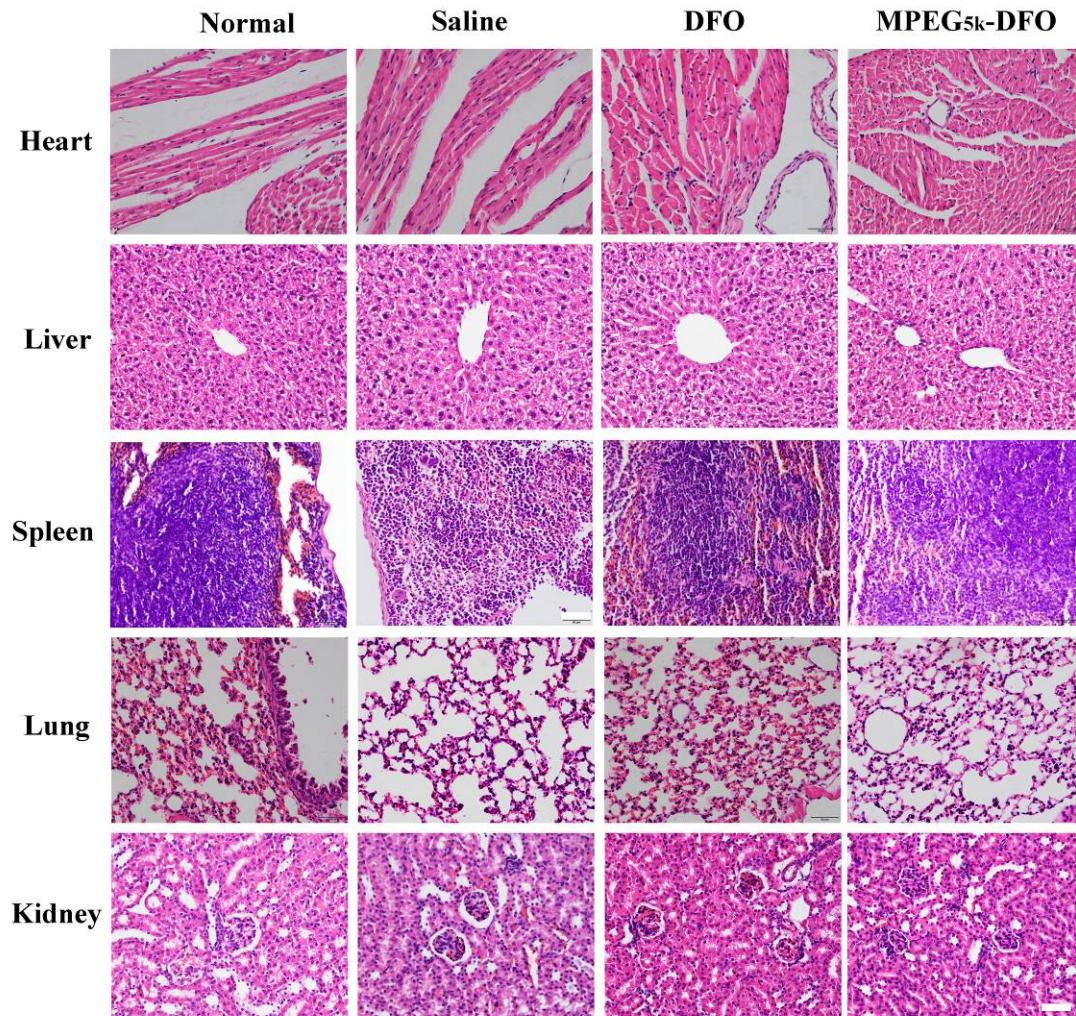

**Figure S1.** Representative H.E. staining photomicrographs of the heart, liver, spleen, lung, and kidney of normal, Saline, DFO, and MPEG<sub>5k</sub>-DFO groups. Scale bar: 50  $\mu$ m.
